# Supplementary material for: Generation and Characterization of SORT1-Targeted Antibody–Drug Conjugate for the Treatment of SORT1-Positive Breast Tumor
Source: MDPI journal article supplement (doi:10.3390/ijms242417631), 2023-12-18
Supplement: s1 [file s1]

## Supplementary Figures

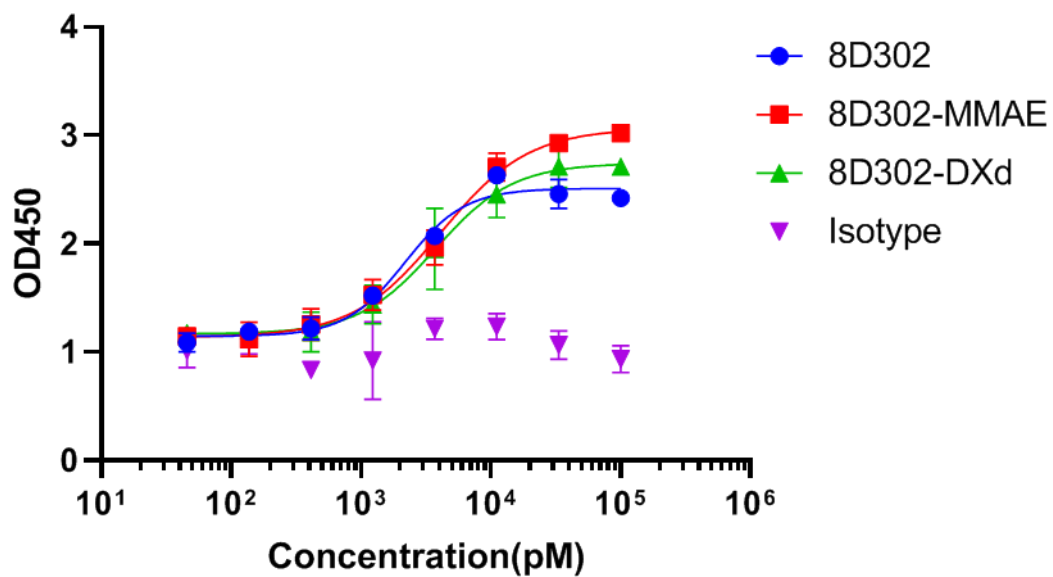

Figure S1. Comparison of cell binding activity between 8D302 and 8D302-ADCs. Data are presented as mean $\pm$ SD from 3 independent experiments and EC<sub>50</sub> was calculated using GraphPad Prism software.

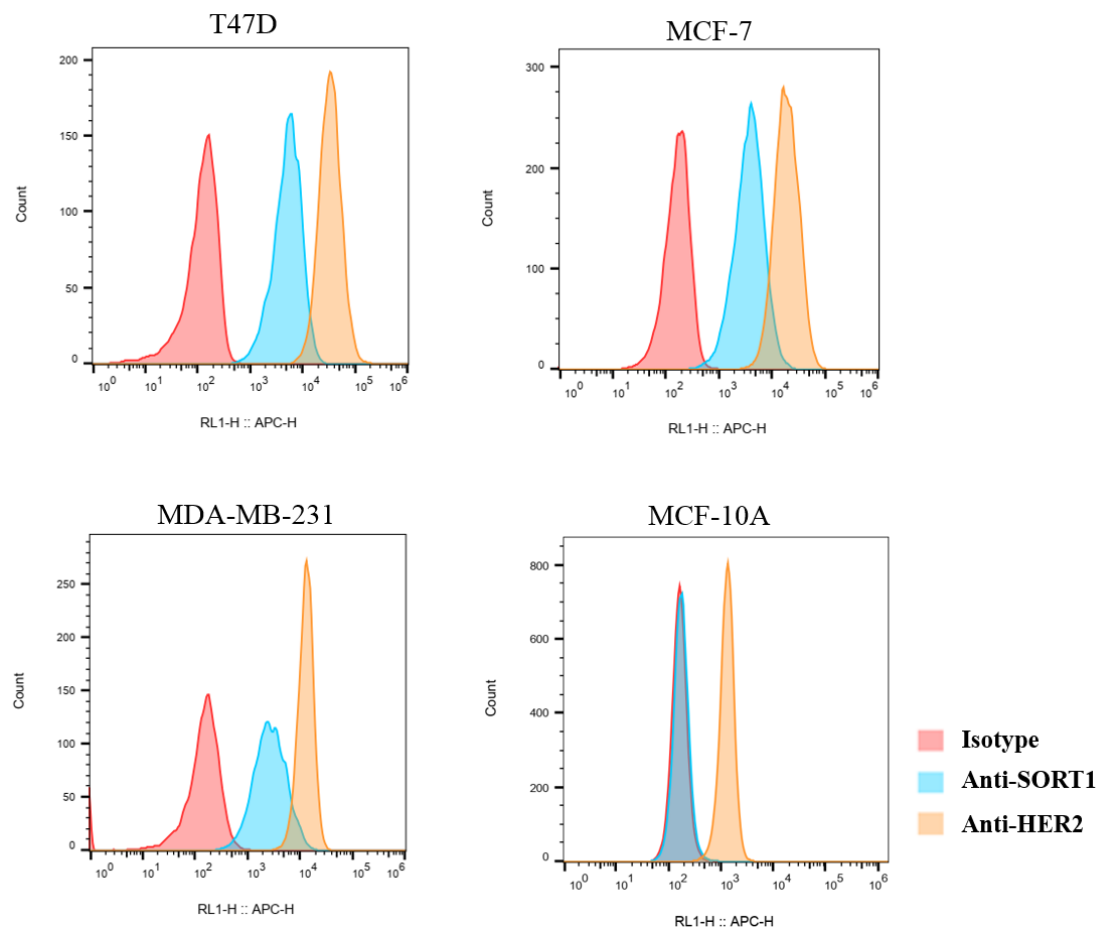

**Figure S2. Evaluation of SORT1 and HER2 expression level on the surface of breast cells.**

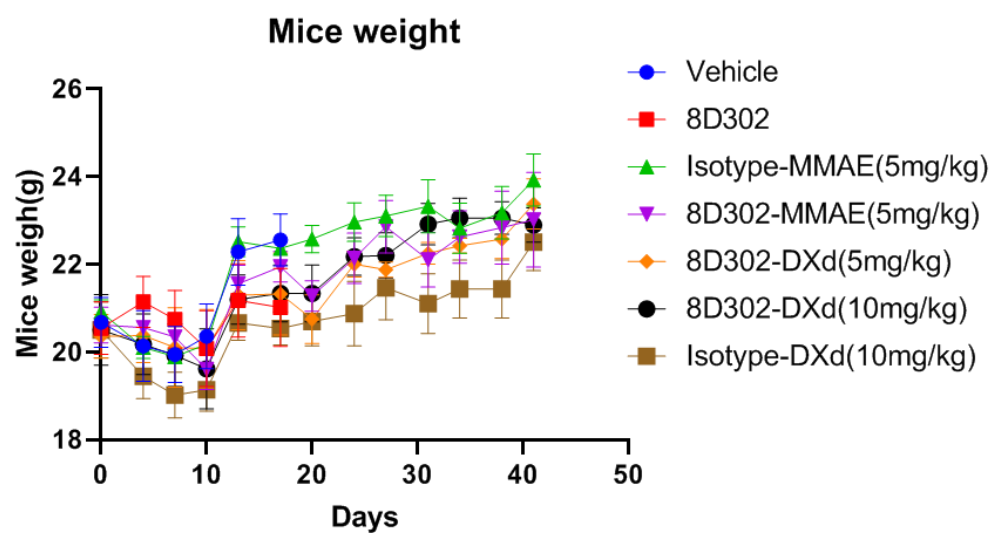

**Figure S3. The body weight of tumor-bearing mice.** Data are presented as mean $\pm$ SEM from five mice.
